# Supplementary material
Source: HighWire-hosted journal article supplement (https://qualitysafety.bmj.com/highwire/filestream/147695/field_highwire_adjunct_files/0/bmjqs-2015-004035supp.pdf)

**APPENDIX (Supplemental Figure). Selection Process for Study Hospitals**

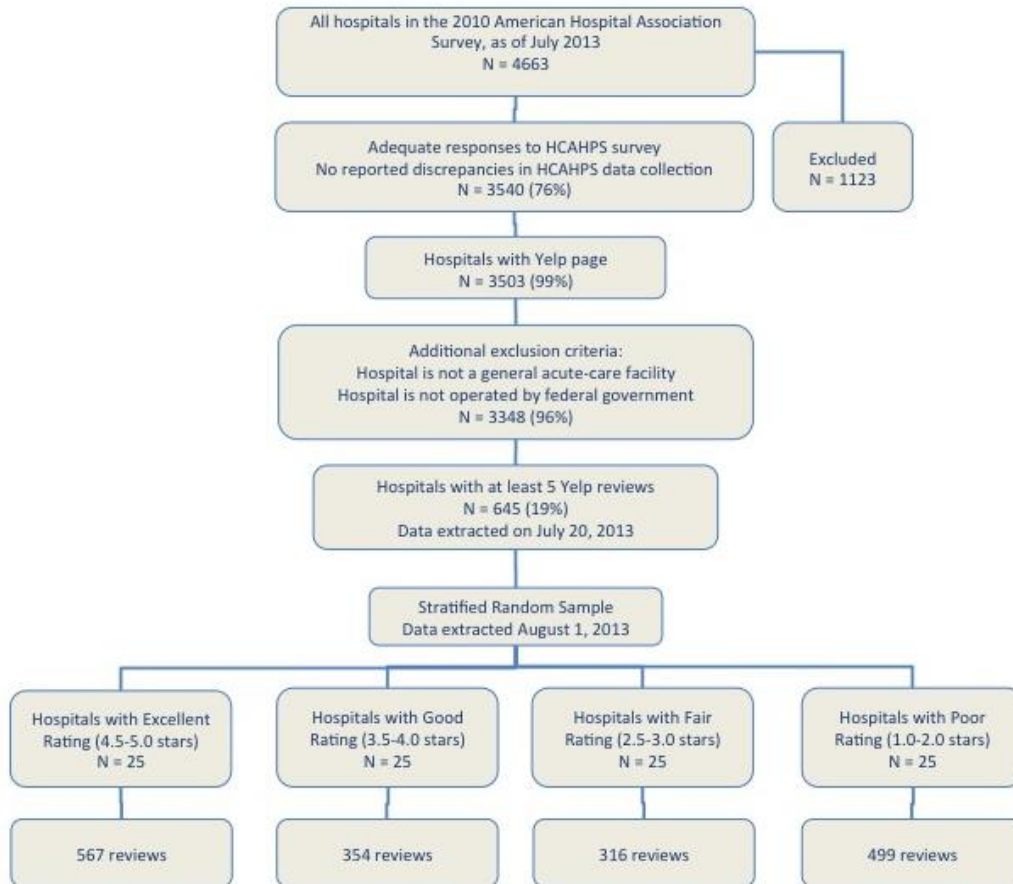

Supplement: bmjqs-2015-004035supp.pdf [file bmjqs-2015-004035supp.pdf]
